# Supplementary material for: Hepatic ferredoxin reductase modulates mitochondrial function and iron homeostasis in metabolic dysfunction-associated steatotic liver disease
Source: Research Square preprint supplement (doi:10.21203/rs.3.rs-7014857/v1), 2025-08-27
Supplement: Supplementary file 1 [file 8c5819333910a0c801060ec2.docx]

**Supplementary Table 1. Primers used for Quantitative Reverse Transcriptase PCR.**

| Gene |  | Primers |
| --- | --- | --- |
| *Fdxr*  *(mouse)* | Forward | CATGCTGTGGTGCTGAGTTA |
| Reverse | AAGTCCATTGTACCAGCCCA |
| *FDXR*  *(human)* | Forward | CAGCATTGGGTATAAGAGCC |
| Reverse | GTCAGTCATGGTTGTGGCTA |
| *β-actin*  *(mouse)* | Forward | GATCTGGCACCACACCTTCT |
| Reverse | GGGGTGTTGAAGGTCTCAAA |
| *β-actin*  *(human)* | Forward | CCTGGCACCCAGCACA |
| Reverse | GCCGATCCACACGGAG |
| *Cdkn1a*  *(mouse)* | Forward | AGATCCACAGCGATAT |
| Reverse | ACGAAGAGACAACGG |
| *CDKN1A*  *(human)* | Forward | GTTCCTTGTGGAGCCGGAGC |
| Reverse | GGTACAAGACAGTGACAGGTC |
| *Tfr1*  *(mouse)* | Forward | GTTTCTGCCAGCCCCTTATTAT |
| Reverse | GCAAGGAAAGGATATGCAGCA |
