# Supplementary material for: Hepatic ferredoxin reductase modulates mitochondrial function and iron homeostasis in metabolic dysfunction-associated steatotic liver disease
Source: Research Square preprint supplement (doi:10.21203/rs.3.rs-7014857/v1), 2025-08-27
Supplement: Supplementary file 1 [file d8a65a39bb2a98671610e1da.pdf]

Figure S1

a

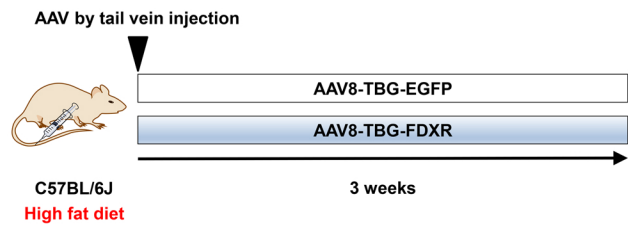

b

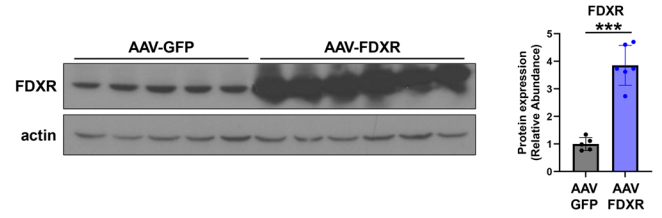

c

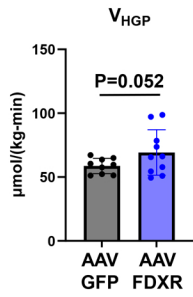

d

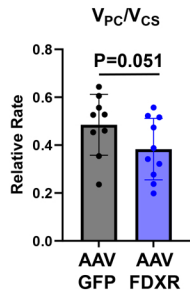

e

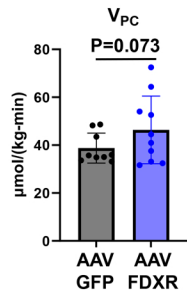

f

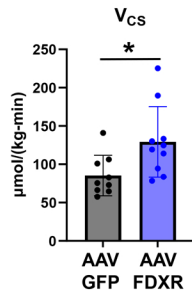

g

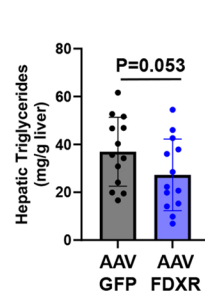

**Supplementary Figure 1. FDXR increases TCA cycle flux in the liver and alleviates steatosis.**

**(a)** Study design. AAV8-TBG-EGFP (AAV-GFP) or AAV8-TBG-FDXR (AAV-FDXR) was administered to C57BL6J mice, which were then fed a high-fat diet for 3 weeks. **(b)** FDXR protein levels in the liver. AAV-FDXR (n = 5) induced FDXR protein expression in the liver compared to AAV-GFP (n = 6). \*\*\*P < 0.001 (Unpaired one-sided Student's t-test). **(c–f)** Hepatic mitochondrial flux measured using the positional isotopomer NMR tracer analysis (PINTA) in AAV-FDXR-treated mice (n = 10) and AAV-GFP-treated mice (n = 9). **(c)** Hepatic glucose production ( $V_{HGP}$ ). **(d)** Mitochondrial pyruvate carboxylase flux relative to citrate synthase flux ( $V_{PC}/V_{CS}$ ). **(e)** Absolute rates of  $V_{PC}$ . **(f)** Absolute rates of  $V_{CS}$ .  $V_{CS}$  was significantly increased in AAV-FDXR-treated mice compared to that in AAV-GFP-treated mice. \*P < 0.05 (Unpaired one-sided Student's t-test).

Figure S2

a

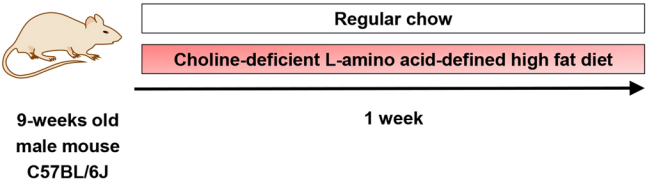

b

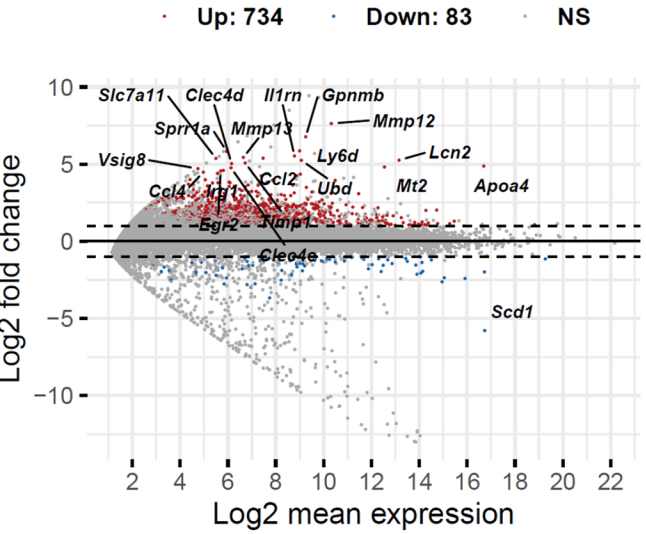

d

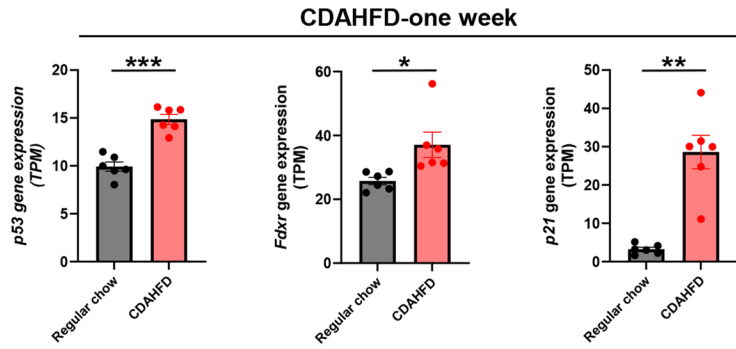

c

GSEA Enrichment  
Down and Up-regulated Pathway

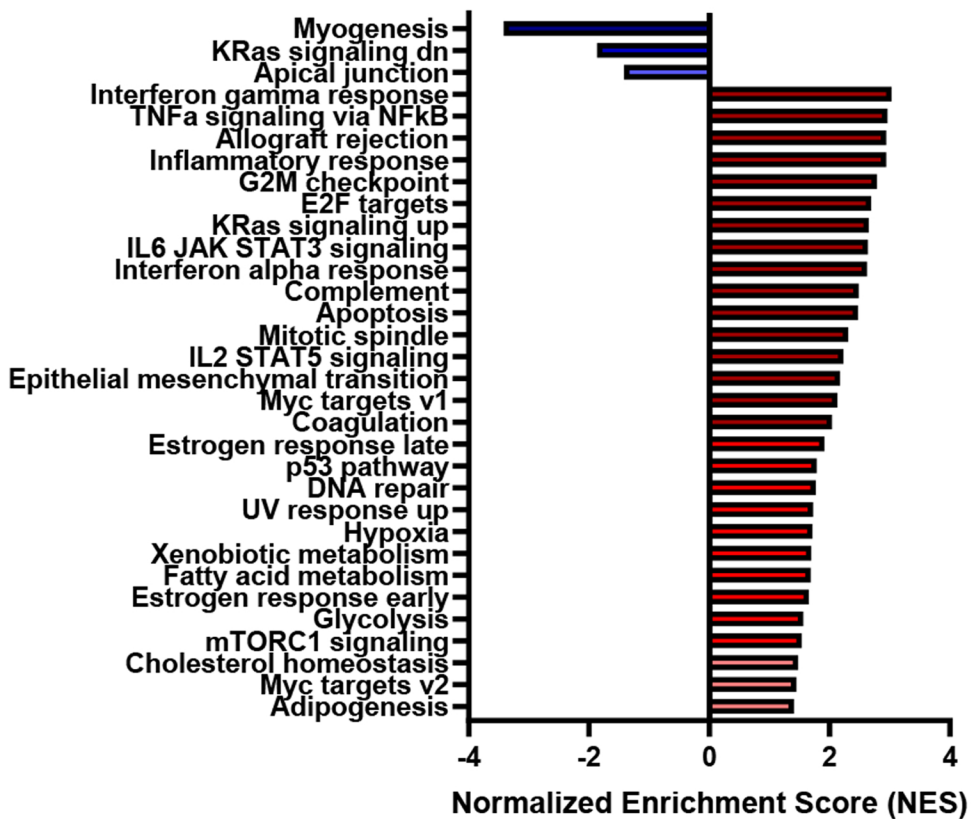

**Supplementary Figure 2. CDAHFD induces steatohepatitis and activates the p53–FDXR pathway in the liver. (a)** Study design. Male C57BL/6J mice were fed either regular chow or a choline-deficient, L-amino acid-defined, high-fat diet (CDAHFD) for one week. **(b)** MA plot showing differentially expressed genes (DEGs) between CDAHFD-fed and regular chow-fed mice, based on RNA-seq analysis. **(c)** Gene set enrichment analysis (GSEA) demonstrating significant enrichment of inflammatory and metabolic pathways in the CDAHFD group. Enrichment of the “p53 pathway” was also observed. **(d)** Expression levels of *p53*, *Fdxr*, and *p21* quantified from RNA-seq data in CDAHFD-fed livers compared to regular chow-fed controls.
